# Supplementary material
Source: PubMed Central journal article supplement (PMC6333501)
Supplement: NIHMS1509098-supplement-1.pdf [file NIHMS1509098-supplement-1.pdf]

# Supplemental Figure 1

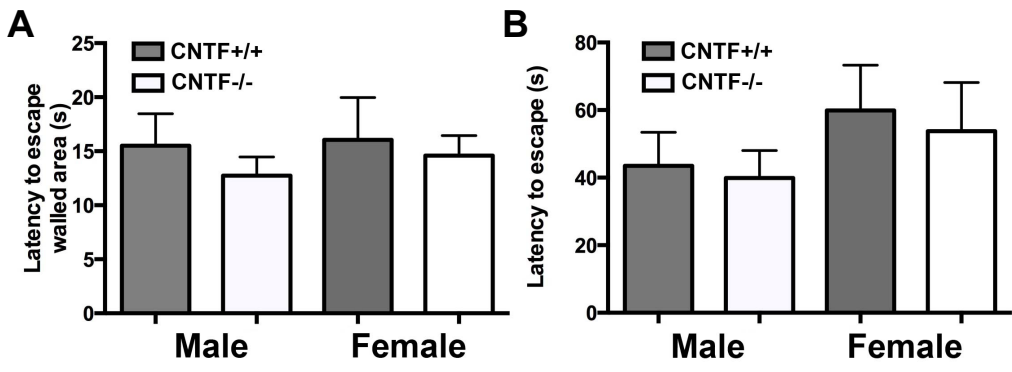

**Supplemental Figure 1.** CNTF was not involved in anxiety-like behavior tested by elevated-T maze test. Both male and female CNTF+/+ and CNTF-/- were subjected to an elevated T-maze test. There were no group differences in both latency to escape walled area A) and latency to escape B). N= 10 mice/group (Two-way ANOVA followed by Newman-keuls multiple comparisons).
